# Supplementary material for: Far-infrared absorption spectra of synthetically-prepared, ligated metal clusters with Au6, Au8, Au9 and Au6Pd metal cores
Source: Royal Society of Chemistry journal article supplement (doi:10.1039/c3ra44803g), 2013-01-01
Supplement: c3ra44803g.pdf [file c3ra44803g.pdf]

|     |   |            |           |           |     |   |           |           |           |
|-----|---|------------|-----------|-----------|-----|---|-----------|-----------|-----------|
| 99  | 1 | -3.715181  | 2.589656  | -0.702711 | 150 | 6 | 0.538201  | -2.018287 | 4.267812  |
| 100 | 6 | -5.406223  | 5.620995  | 1.067989  | 151 | 6 | 0.923155  | -2.840882 | 5.341457  |
| 101 | 1 | -5.821445  | 4.251326  | 2.684404  | 152 | 6 | 0.507144  | -0.623951 | 4.436444  |
| 102 | 6 | -4.85369   | 5.777611  | -0.212901 | 153 | 6 | 1.25459   | -2.270325 | 6.577503  |
| 103 | 1 | -3.829237  | 4.80402   | -1.850753 | 154 | 1 | 0.950637  | -3.922323 | 5.22138   |
| 104 | 1 | -5.883393  | 6.462242  | 1.560936  | 155 | 6 | 0.838691  | -0.054755 | 5.673571  |
| 105 | 1 | -4.897363  | 6.74195   | -0.710059 | 156 | 1 | 0.221677  | 0.016232  | 3.598398  |
| 106 | 6 | -6.435532  | 1.415066  | 2.540134  | 157 | 6 | 1.20397   | -0.8786   | 6.747256  |
| 107 | 6 | -6.796152  | 1.629986  | 3.879848  | 158 | 1 | 1.545188  | -2.909833 | 7.404923  |
| 108 | 6 | -7.419369  | 1.057632  | 1.600724  | 159 | 1 | 0.803175  | 1.026387  | 5.797831  |
| 109 | 6 | -8.133702  | 1.485337  | 4.276912  | 160 | 1 | 1.448966  | -0.439677 | 7.709953  |
| 110 | 1 | -6.053875  | 1.908847  | 4.62376   | 161 | 6 | -1.266649 | 3.968201  | -2.878525 |
| 111 | 6 | -8.754853  | 0.926532  | 1.997714  | 162 | 6 | -1.6402   | 4.729849  | -4.000209 |
| 112 | 1 | -7.141952  | 0.882609  | 0.560384  | 163 | 6 | -0.958153 | 4.603831  | -1.665885 |
| 113 | 6 | -9.113589  | 1.137102  | 3.338105  | 164 | 6 | -1.706495 | 6.126098  | -3.900166 |
| 114 | 1 | -8.408819  | 1.648912  | 5.31413   | 165 | 1 | -1.888273 | 4.239926  | -4.940337 |
| 115 | 1 | -9.51221   | 0.662212  | 1.266126  | 166 | 6 | -1.014697 | 6.000742  | -1.571761 |
| 116 | 1 | -10.148381 | 1.03077   | 3.647601  | 167 | 1 | -0.679335 | 4.012337  | -0.793223 |
| 117 | 6 | -4.581551  | -3.62924  | -0.705467 | 168 | 6 | -1.391965 | 6.76145   | -2.687359 |
| 118 | 6 | -3.820583  | -3.91027  | 0.440545  | 169 | 1 | -1.999995 | 6.71582   | -4.762934 |
| 119 | 6 | -5.167722  | -4.677784 | -1.435992 | 170 | 1 | -0.774099 | 6.48295   | -0.627872 |
| 120 | 6 | -3.636427  | -5.239082 | 0.848694  | 171 | 1 | -1.443135 | 7.84341   | -2.615348 |
| 121 | 1 | -3.372083  | -3.095502 | 1.015182  | 172 | 6 | -2.369139 | 1.608909  | -4.257763 |
| 122 | 6 | -4.982564  | -6.004203 | -1.025202 | 173 | 6 | -2.003428 | 1.057816  | -5.496906 |
| 123 | 1 | -5.773654  | -4.460874 | -2.314599 | 174 | 6 | -3.733437 | 1.760155  | -3.941028 |
| 124 | 6 | -4.213059  | -6.284942 | 0.114935  | 175 | 6 | -2.992863 | 0.650402  | -6.405986 |
| 125 | 1 | -3.057992  | -5.452363 | 1.744464  | 176 | 1 | -0.956088 | 0.953768  | -5.772278 |
| 126 | 1 | -5.438872  | -6.812923 | -1.58731  | 177 | 6 | -4.718392 | 1.370592  | -4.856076 |
| 127 | 1 | -4.073652  | -7.313097 | 0.436432  | 178 | 1 | -4.029411 | 2.186705  | -2.982391 |
| 128 | 6 | -6.465558  | -1.72205  | -1.932461 | 179 | 6 | -4.349061 | 0.806422  | -6.088518 |
| 129 | 6 | -7.507977  | -1.934913 | -1.011318 | 180 | 1 | -2.704704 | 0.230094  | -7.364611 |
| 130 | 6 | -6.766263  | -1.371958 | -3.258453 | 181 | 1 | -5.766819 | 1.51122   | -4.610022 |
| 131 | 6 | -8.840597  | -1.813653 | -1.420306 | 182 | 1 | -5.111453 | 0.505751  | -6.800335 |
| 132 | 1 | -7.277903  | -2.202005 | 0.019783  | 183 | 6 | 0.590952  | -4.283762 | -2.60525  |
| 133 | 6 | -8.10376   | -1.243378 | -3.662399 | 184 | 6 | 1.164477  | -5.164818 | -3.536352 |
| 134 | 1 | -5.972533  | -1.203229 | -3.98362  | 185 | 6 | -0.013255 | -4.789552 | -1.438099 |
| 135 | 6 | -9.140934  | -1.465516 | -2.747261 | 186 | 6 | 1.128561  | -6.54717  | -3.303182 |
| 136 | 1 | -9.641621  | -1.994667 | -0.710235 | 187 | 1 | 1.634663  | -4.77996  | -4.438941 |
| 137 | 1 | -8.334492  | -0.978915 | -4.68998  | 188 | 6 | -0.065872 | -6.172668 | -1.221624 |
| 138 | 1 | -10.174792 | -1.372617 | -3.064087 | 189 | 1 | -0.46156  | -4.112566 | -0.707944 |
| 139 | 6 | -0.581618  | -4.42802  | 3.01757   | 190 | 6 | 0.507931  | -7.052306 | -2.151972 |
| 140 | 6 | -1.656904  | -4.530709 | 3.920993  | 191 | 1 | 1.57325   | -7.226579 | -4.023439 |
| 141 | 6 | -0.058273  | -5.590721 | 2.429105  | 192 | 1 | -0.568124 | -6.555947 | -0.336601 |
| 142 | 6 | -2.183805  | -5.785218 | 4.249731  | 193 | 1 | 0.468543  | -8.124025 | -1.983965 |
| 143 | 1 | -2.072804  | -3.633083 | 4.375929  | 194 | 6 | 1.695596  | -2.09832  | -4.312266 |
| 144 | 6 | -0.591879  | -6.847058 | 2.755666  | 195 | 6 | 1.248813  | -1.741807 | -5.595845 |
| 145 | 1 | 0.769745   | -5.532921 | 1.724712  | 196 | 6 | 3.0773    | -2.126314 | -4.038695 |
| 146 | 6 | -1.650405  | -6.947696 | 3.668858  | 197 | 6 | 2.176851  | -1.400888 | -6.592608 |
| 147 | 1 | -3.004924  | -5.857413 | 4.955548  | 198 | 1 | 0.187103  | -1.733695 | -5.832911 |
| 148 | 1 | -0.171237  | -7.74342  | 2.309181  | 199 | 6 | 4.001363  | -1.799198 | -5.038247 |
| 149 | 1 | -2.053569  | -7.920519 | 3.931103  | 200 | 1 | 3.42912   | -2.391835 | -3.040417 |

|     |   |           |           |           |
|-----|---|-----------|-----------|-----------|
| 201 | 6 | 3.5507    | -1.427203 | -6.315102 |
| 202 | 1 | 1.82794   | -1.128038 | -7.583802 |
| 203 | 1 | 5.065994  | -1.819649 | -4.818077 |
| 204 | 1 | 4.267675  | -1.165415 | -7.086872 |
| 205 | 6 | 1.000371  | 3.193485  | 4.067046  |
| 206 | 6 | 2.388002  | 3.022411  | 4.218563  |
| 207 | 6 | 0.227113  | 3.606305  | 5.164099  |
| 208 | 6 | 2.996762  | 3.269479  | 5.455391  |
| 209 | 1 | 2.995333  | 2.714175  | 3.365674  |
| 210 | 6 | 0.836238  | 3.838877  | 6.406302  |
| 211 | 1 | -0.845345 | 3.761285  | 5.064308  |
| 212 | 6 | 2.220928  | 3.673318  | 6.553203  |
| 213 | 1 | 4.071912  | 3.15625   | 5.558539  |
| 214 | 1 | 0.234446  | 4.160996  | 7.250335  |
| 215 | 1 | 2.692918  | 3.869814  | 7.510544  |
| 216 | 6 | 0.838291  | 4.576411  | 1.553798  |
| 217 | 6 | 0.394461  | 5.815829  | 2.048253  |
| 218 | 6 | 1.791964  | 4.534932  | 0.523726  |
| 219 | 6 | 0.902331  | 7.0056    | 1.510109  |
| 220 | 1 | -0.321273 | 5.861205  | 2.867193  |
| 221 | 6 | 2.299434  | 5.726302  | -0.013346 |
| 222 | 1 | 2.150753  | 3.57297   | 0.150881  |
| 223 | 6 | 1.857013  | 6.960998  | 0.480744  |
| 224 | 1 | 0.56934   | 7.961575  | 1.902143  |
| 225 | 1 | 3.043283  | 5.683429  | -0.805834 |
| 226 | 1 | 2.256959  | 7.884379  | 0.073451  |
