# Supplementary material for: Far-infrared absorption spectra of synthetically-prepared, ligated metal clusters with Au6, Au8, Au9 and Au6Pd metal cores
Source: Royal Society of Chemistry journal article supplement (doi:10.1039/c3ra44803g), 2013-01-01
Supplement: c3ra44803g_2.pdf [file c3ra44803g_2.pdf]

| $[\text{Au}_6\text{Pd}(\text{PPh}_3)_7]^{2+}$ |               |                         |           |           | 47 | 1 | 2.777512  | -3.387827 | -0.095424 |
|-----------------------------------------------|---------------|-------------------------|-----------|-----------|----|---|-----------|-----------|-----------|
| Center                                        | Atomic Number | Coordinates (Angstroms) |           |           | 48 | 6 | -1.604094 | 0.178195  | 5.039638  |
|                                               |               | X                       | Y         | Z         | 49 | 6 | -2.182031 | 0.296554  | 6.316568  |
| 1                                             | 79            | 1.295603                | -1.219035 | 1.218229  | 50 | 1 | -3.263789 | 0.31463   | 6.432571  |
| 2                                             | 79            | -1.411058               | -0.041586 | 1.348301  | 51 | 6 | -1.360495 | 0.390197  | 7.447715  |
| 3                                             | 79            | -2.515118               | -1.506688 | -0.988859 | 52 | 1 | -1.80744  | 0.483409  | 8.43252   |
| 4                                             | 79            | 1.068948                | 1.557955  | 0.758854  | 53 | 6 | 0.037313  | 0.352472  | 7.311302  |
| 5                                             | 79            | 2.681071                | -0.099667 | -1.12898  | 54 | 1 | 0.668598  | 0.418948  | 8.191811  |
| 6                                             | 79            | -2.426682               | 1.262496  | -1.049395 | 55 | 6 | 0.615928  | 0.219882  | 6.041491  |
| 7                                             | 46            | -0.046365               | -0.222193 | -1.048599 | 56 | 1 | 1.697733  | 0.184615  | 5.927164  |
| 8                                             | 15            | 2.532613                | -2.725233 | 2.723849  | 57 | 6 | -0.205495 | 0.135391  | 4.908189  |
| 9                                             | 15            | -2.628058               | -0.002568 | 3.492783  | 58 | 1 | 0.239766  | 0.027349  | 3.915174  |
| 10                                            | 15            | -3.391568               | -3.811096 | -1.155708 | 59 | 6 | -3.629189 | -1.558905 | 3.727694  |
| 11                                            | 15            | 1.833468                | 3.744814  | 1.538976  | 60 | 6 | -4.801306 | -1.586541 | 4.502895  |
| 12                                            | 15            | 5.059405                | -0.219922 | -1.80244  | 61 | 1 | -5.185856 | -0.669857 | 4.946469  |
| 13                                            | 15            | -3.546342               | 3.427424  | -1.387078 | 62 | 6 | -5.485328 | -2.795827 | 4.684824  |
| 14                                            | 15            | 0.164625                | -0.464947 | -3.45047  | 63 | 1 | -6.389194 | -2.818997 | 5.285809  |
| 15                                            | 6             | 3.396686                | -1.674432 | 4.001434  | 64 | 6 | -5.004682 | -3.974764 | 4.092242  |
| 16                                            | 6             | 3.797237                | -2.200897 | 5.241509  | 65 | 1 | -5.543277 | -4.908266 | 4.227127  |
| 17                                            | 1             | 3.581021                | -3.237686 | 5.493413  | 66 | 6 | -3.84255  | -3.945692 | 3.30864   |
| 18                                            | 6             | 4.45857                 | -1.380045 | 6.166584  | 67 | 1 | -3.478206 | -4.852945 | 2.832008  |
| 19                                            | 1             | 4.77016                 | -1.787929 | 7.122997  | 68 | 6 | -3.155719 | -2.737987 | 3.126126  |
| 20                                            | 6             | 4.713431                | -0.033939 | 5.859532  | 69 | 1 | -2.257099 | -2.712515 | 2.505745  |
| 21                                            | 1             | 5.223636                | 0.598273  | 6.579551  | 70 | 6 | -3.865542 | 1.386771  | 3.472503  |
| 22                                            | 6             | 4.304091                | 0.496343  | 4.625849  | 71 | 6 | -3.762533 | 2.508687  | 4.308783  |
| 23                                            | 1             | 4.49132                 | 1.539824  | 4.382802  | 72 | 1 | -2.981728 | 2.563613  | 5.066009  |
| 24                                            | 6             | 3.649077                | -0.32343  | 3.696466  | 73 | 6 | -4.668028 | 3.571628  | 4.165476  |
| 25                                            | 1             | 3.32769                 | 0.095127  | 2.740365  | 74 | 1 | -4.589704 | 4.435881  | 4.818661  |
| 26                                            | 6             | 1.646317                | -4.040135 | 3.694495  | 75 | 6 | -5.662744 | 3.524615  | 3.180058  |
| 27                                            | 6             | 0.429507                | -3.682886 | 4.30382   | 76 | 1 | -6.35558  | 4.352873  | 3.06432   |
| 28                                            | 1             | 0.050395                | -2.663812 | 4.215338  | 77 | 6 | -5.760841 | 2.406514  | 2.335782  |
| 29                                            | 6             | -0.298204               | -4.638483 | 5.022363  | 78 | 1 | -6.526753 | 2.368732  | 1.564873  |
| 30                                            | 1             | -1.236235               | -4.358668 | 5.492826  | 79 | 6 | -4.865209 | 1.341572  | 2.479779  |
| 31                                            | 6             | 0.184214                | -5.952776 | 5.128733  | 80 | 1 | -4.937447 | 0.480215  | 1.81524   |
| 32                                            | 1             | -0.38148                | -6.695283 | 5.682552  | 81 | 6 | -4.930825 | -4.033246 | -0.134724 |
| 33                                            | 6             | 1.397807                | -6.307399 | 4.522246  | 82 | 6 | -5.543213 | -2.886336 | 0.398002  |
| 34                                            | 1             | 1.77342                 | -7.322179 | 4.60939   | 83 | 1 | -5.09806  | -1.906316 | 0.219092  |
| 35                                            | 6             | 2.133874                | -5.351645 | 3.805551  | 84 | 6 | -6.712489 | -3.005014 | 1.160734  |
| 36                                            | 1             | 3.069326                | -5.634146 | 3.326846  | 85 | 1 | -7.181615 | -2.117335 | 1.575097  |
| 37                                            | 6             | 3.877807                | -3.583257 | 1.764133  | 86 | 6 | -7.268546 | -4.270435 | 1.394514  |
| 38                                            | 6             | 5.064792                | -4.029199 | 2.36981   | 87 | 1 | -8.176493 | -4.363963 | 1.982461  |
| 39                                            | 1             | 5.223276                | -3.891566 | 3.438298  | 88 | 6 | -6.652008 | -5.418797 | 0.871682  |
| 40                                            | 6             | 6.05863                 | -4.640151 | 1.592107  | 89 | 1 | -7.084104 | -6.398178 | 1.051795  |
| 41                                            | 1             | 6.977218                | -4.979887 | 2.059994  | 90 | 6 | -5.484017 | -5.302302 | 0.106847  |
| 42                                            | 6             | 5.869723                | -4.803606 | 0.211369  | 91 | 1 | -5.014218 | -6.195298 | -0.300941 |
| 43                                            | 1             | 6.643801                | -5.267469 | -0.392677 | 92 | 6 | -2.137885 | -5.033765 | -0.515526 |
| 44                                            | 6             | 4.683688                | -4.364268 | -0.394312 | 93 | 6 | -2.192584 | -6.399179 | -0.845996 |
| 45                                            | 1             | 4.534984                | -4.488401 | -1.463791 | 94 | 1 | -2.946672 | -6.765417 | -1.540374 |
| 46                                            | 6             | 3.688191                | -3.75561  | 0.380655  | 95 | 6 | -1.252727 | -7.287221 | -0.305217 |
|                                               |               |                         |           |           | 96 | 1 | -1.29765  | -8.34101  | -0.561975 |
|                                               |               |                         |           |           | 97 | 6 | -0.257925 | -6.815462 | 0.565238  |

|     |   |           |           |           |     |   |           |           |           |
|-----|---|-----------|-----------|-----------|-----|---|-----------|-----------|-----------|
| 98  | 1 | 0.466154  | -7.503857 | 0.991498  | 149 | 1 | 4.737207  | 2.669438  | -1.579258 |
| 99  | 6 | -0.193122 | -5.451295 | 0.88209   | 150 | 6 | 5.8668    | 3.586808  | -3.176579 |
| 100 | 1 | 0.579998  | -5.082958 | 1.553454  | 151 | 1 | 5.635427  | 4.59823   | -2.855785 |
| 101 | 6 | -1.128624 | -4.560192 | 0.3406    | 152 | 6 | 6.660676  | 3.371238  | -4.313997 |
| 102 | 1 | -1.065335 | -3.493659 | 0.571824  | 153 | 1 | 7.051711  | 4.216207  | -4.87256  |
| 103 | 6 | -3.808786 | -4.422932 | -2.862704 | 154 | 6 | 6.949379  | 2.063295  | -4.729566 |
| 104 | 6 | -2.74802  | -4.625876 | -3.766095 | 155 | 1 | 7.560934  | 1.893862  | -5.610262 |
| 105 | 1 | -1.713494 | -4.487979 | -3.443242 | 156 | 6 | 6.459884  | 0.96834   | -4.001831 |
| 106 | 6 | -3.015598 | -5.010856 | -5.084252 | 157 | 1 | 6.690299  | -0.044705 | -4.325256 |
| 107 | 1 | -2.190508 | -5.163405 | -5.774146 | 158 | 6 | 6.283262  | -0.272146 | -0.395508 |
| 108 | 6 | -4.341765 | -5.194235 | -5.508024 | 159 | 6 | 7.581777  | 0.250247  | -0.531403 |
| 109 | 1 | -4.550124 | -5.494051 | -6.530158 | 160 | 1 | 7.893631  | 0.708981  | -1.467852 |
| 110 | 6 | -5.397289 | -4.991573 | -4.608259 | 161 | 6 | 8.475418  | 0.190208  | 0.547971  |
| 111 | 1 | -6.423069 | -5.137071 | -4.932163 | 162 | 1 | 9.478984  | 0.588954  | 0.437761  |
| 112 | 6 | -5.135196 | -4.600942 | -3.286246 | 163 | 6 | 8.073338  | -0.381975 | 1.765468  |
| 113 | 1 | -5.96029  | -4.440752 | -2.595505 | 164 | 1 | 8.765456  | -0.421242 | 2.600838  |
| 114 | 6 | 3.619356  | 3.659137  | 2.058497  | 165 | 6 | 6.778105  | -0.901705 | 1.901287  |
| 115 | 6 | 4.453333  | 2.72753   | 1.415509  | 166 | 1 | 6.454287  | -1.337688 | 2.844061  |
| 116 | 1 | 4.031078  | 2.030079  | 0.686898  | 167 | 6 | 5.885876  | -0.850956 | 0.821279  |
| 117 | 6 | 5.821222  | 2.685201  | 1.714465  | 168 | 1 | 4.88245   | -1.266237 | 0.925696  |
| 118 | 1 | 6.461847  | 1.972893  | 1.200548  | 169 | 6 | 5.372296  | -1.754443 | -2.807617 |
| 119 | 6 | 6.355087  | 3.560648  | 2.671474  | 170 | 6 | 6.583713  | -2.460762 | -2.741548 |
| 120 | 1 | 7.415114  | 3.526141  | 2.904285  | 171 | 1 | 7.370413  | -2.14044  | -2.060807 |
| 121 | 6 | 5.519858  | 4.475671  | 3.331592  | 172 | 6 | 6.774771  | -3.591218 | -3.549877 |
| 122 | 1 | 5.931444  | 5.150033  | 4.076007  | 173 | 1 | 7.71417   | -4.133694 | -3.504684 |
| 123 | 6 | 4.15234   | 4.529779  | 3.023685  | 174 | 6 | 5.75982   | -4.014815 | -4.422263 |
| 124 | 1 | 3.508563  | 5.242228  | 3.535574  | 175 | 1 | 5.914827  | -4.886855 | -5.050003 |
| 125 | 6 | 0.932607  | 4.410494  | 3.020263  | 176 | 6 | 4.546397  | -3.311568 | -4.482244 |
| 126 | 6 | 0.826058  | 5.784511  | 3.28531   | 177 | 1 | 3.750777  | -3.637297 | -5.148176 |
| 127 | 1 | 1.228779  | 6.510347  | 2.580162  | 178 | 6 | 4.35162   | -2.184421 | -3.67332  |
| 128 | 6 | 0.185649  | 6.215294  | 4.456819  | 179 | 1 | 3.403053  | -1.646351 | -3.709993 |
| 129 | 1 | 0.111046  | 7.27725   | 4.671262  | 180 | 6 | -5.390597 | 3.250492  | -1.215632 |
| 130 | 6 | -0.344902 | 5.278681  | 5.358787  | 181 | 6 | -5.984546 | 2.046231  | -1.635432 |
| 131 | 1 | -0.828214 | 5.619503  | 6.269365  | 182 | 1 | -5.367962 | 1.24857   | -2.051438 |
| 132 | 6 | -0.241087 | 3.90452   | 5.088662  | 183 | 6 | -7.369806 | 1.871482  | -1.512697 |
| 133 | 1 | -0.638236 | 3.167136  | 5.784405  | 184 | 1 | -7.828171 | 0.943608  | -1.840321 |
| 134 | 6 | 0.395863  | 3.472863  | 3.918332  | 185 | 6 | -8.161889 | 2.895152  | -0.968885 |
| 135 | 1 | 0.475934  | 2.405821  | 3.705939  | 186 | 1 | -9.234864 | 2.759857  | -0.875225 |
| 136 | 6 | 1.779967  | 5.049238  | 0.212322  | 187 | 6 | -7.568324 | 4.095888  | -0.550144 |
| 137 | 6 | 0.56909   | 5.234334  | -0.48193  | 188 | 1 | -8.181501 | 4.889945  | -0.135516 |
| 138 | 1 | -0.319723 | 4.658459  | -0.210354 | 189 | 6 | -6.182648 | 4.275486  | -0.672299 |
| 139 | 6 | 0.499351  | 6.166094  | -1.525291 | 190 | 1 | -5.723498 | 5.202368  | -0.333229 |
| 140 | 1 | -0.437248 | 6.303545  | -2.061259 | 191 | 6 | -3.234475 | 4.223627  | -3.037646 |
| 141 | 6 | 1.632468  | 6.916511  | -1.876661 | 192 | 6 | -4.257758 | 4.792877  | -3.809851 |
| 142 | 1 | 1.574383  | 7.64239   | -2.682004 | 193 | 1 | -5.288306 | 4.77056   | -3.461343 |
| 143 | 6 | 2.837665  | 6.731085  | -1.184845 | 194 | 6 | -3.948688 | 5.387648  | -5.043353 |
| 144 | 1 | 3.713401  | 7.315708  | -1.449752 | 195 | 1 | -4.739865 | 5.82763   | -5.642192 |
| 145 | 6 | 2.915456  | 5.79535   | -0.141799 | 196 | 6 | -2.622716 | 5.419683  | -5.499659 |
| 146 | 1 | 3.855152  | 5.652477  | 0.388375  | 197 | 1 | -2.388896 | 5.884693  | -6.452349 |
| 147 | 6 | 5.67415   | 1.185737  | -2.859062 | 198 | 6 | -1.599673 | 4.846136  | -4.726603 |
| 148 | 6 | 5.36791   | 2.497102  | -2.453078 | 199 | 1 | -0.570528 | 4.859477  | -5.076698 |

|     |   |           |           |           |
|-----|---|-----------|-----------|-----------|
| 200 | 6 | -1.906738 | 4.242321  | -3.50103  |
| 201 | 1 | -1.115119 | 3.776324  | -2.910911 |
| 202 | 6 | -3.059174 | 4.725173  | -0.146132 |
| 203 | 6 | -2.774592 | 4.314459  | 1.169406  |
| 204 | 1 | -2.829138 | 3.258494  | 1.443868  |
| 205 | 6 | -2.41044  | 5.267221  | 2.12922   |
| 206 | 1 | -2.188408 | 4.947975  | 3.144994  |
| 207 | 6 | -2.329635 | 6.623965  | 1.782115  |
| 208 | 1 | -2.039863 | 7.355179  | 2.531348  |
| 209 | 6 | -2.620037 | 7.033487  | 0.472983  |
| 210 | 1 | -2.562922 | 8.083393  | 0.203113  |
| 211 | 6 | -2.986177 | 6.084713  | -0.4928   |
| 212 | 1 | -3.212262 | 6.403561  | -1.509267 |
| 213 | 6 | 0.577195  | -2.221324 | -3.939095 |
| 214 | 6 | 0.543735  | -2.678125 | -5.269443 |
| 215 | 1 | 0.282524  | -1.994981 | -6.07582  |
| 216 | 6 | 0.794463  | -4.029087 | -5.552829 |
| 217 | 1 | 0.768674  | -4.377537 | -6.581154 |
| 218 | 6 | 1.058761  | -4.933364 | -4.509855 |
| 219 | 1 | 1.23853   | -5.980744 | -4.732946 |
| 220 | 6 | 1.072722  | -4.485463 | -3.179813 |
| 221 | 1 | 1.243753  | -5.183959 | -2.364662 |
| 222 | 6 | 0.838277  | -3.131752 | -2.898736 |
| 223 | 1 | 0.829256  | -2.773542 | -1.866555 |
| 224 | 6 | -1.401588 | -0.124051 | -4.424158 |
| 225 | 6 | -2.424446 | -1.088484 | -4.403293 |
| 226 | 1 | -2.253272 | -2.058655 | -3.936121 |
| 227 | 6 | -3.663073 | -0.817706 | -4.993123 |
| 228 | 1 | -4.437942 | -1.579533 | -4.976888 |
| 229 | 6 | -3.892231 | 0.426508  | -5.604856 |
| 230 | 1 | -4.853851 | 0.640436  | -6.061427 |
| 231 | 6 | -2.869287 | 1.38378   | -5.639772 |
| 232 | 1 | -3.033085 | 2.343525  | -6.122978 |
| 233 | 6 | -1.624165 | 1.109992  | -5.051495 |
| 234 | 1 | -0.83471  | 1.858637  | -5.093938 |
| 235 | 6 | 1.394519  | 0.709968  | -4.228176 |
| 236 | 6 | 2.169085  | 0.423222  | -5.361194 |
| 237 | 1 | 2.115062  | -0.55433  | -5.836805 |
| 238 | 6 | 3.032285  | 1.401368  | -5.881892 |
| 239 | 1 | 3.643885  | 1.173114  | -6.74961  |
| 240 | 6 | 3.100856  | 2.671628  | -5.292782 |
| 241 | 1 | 3.759211  | 3.427221  | -5.710703 |
| 242 | 6 | 2.325018  | 2.962301  | -4.159044 |
| 243 | 1 | 2.384729  | 3.93896   | -3.683358 |
| 244 | 6 | 1.486829  | 1.978967  | -3.621337 |
| 245 | 1 | 0.905996  | 2.183367  | -2.718799 |
