# Supplementary material for: Far-infrared absorption spectra of synthetically-prepared, ligated metal clusters with Au6, Au8, Au9 and Au6Pd metal cores
Source: Royal Society of Chemistry journal article supplement (doi:10.1039/c3ra44803g), 2013-01-01
Supplement: c3ra44803g_5.pdf [file c3ra44803g_5.pdf]

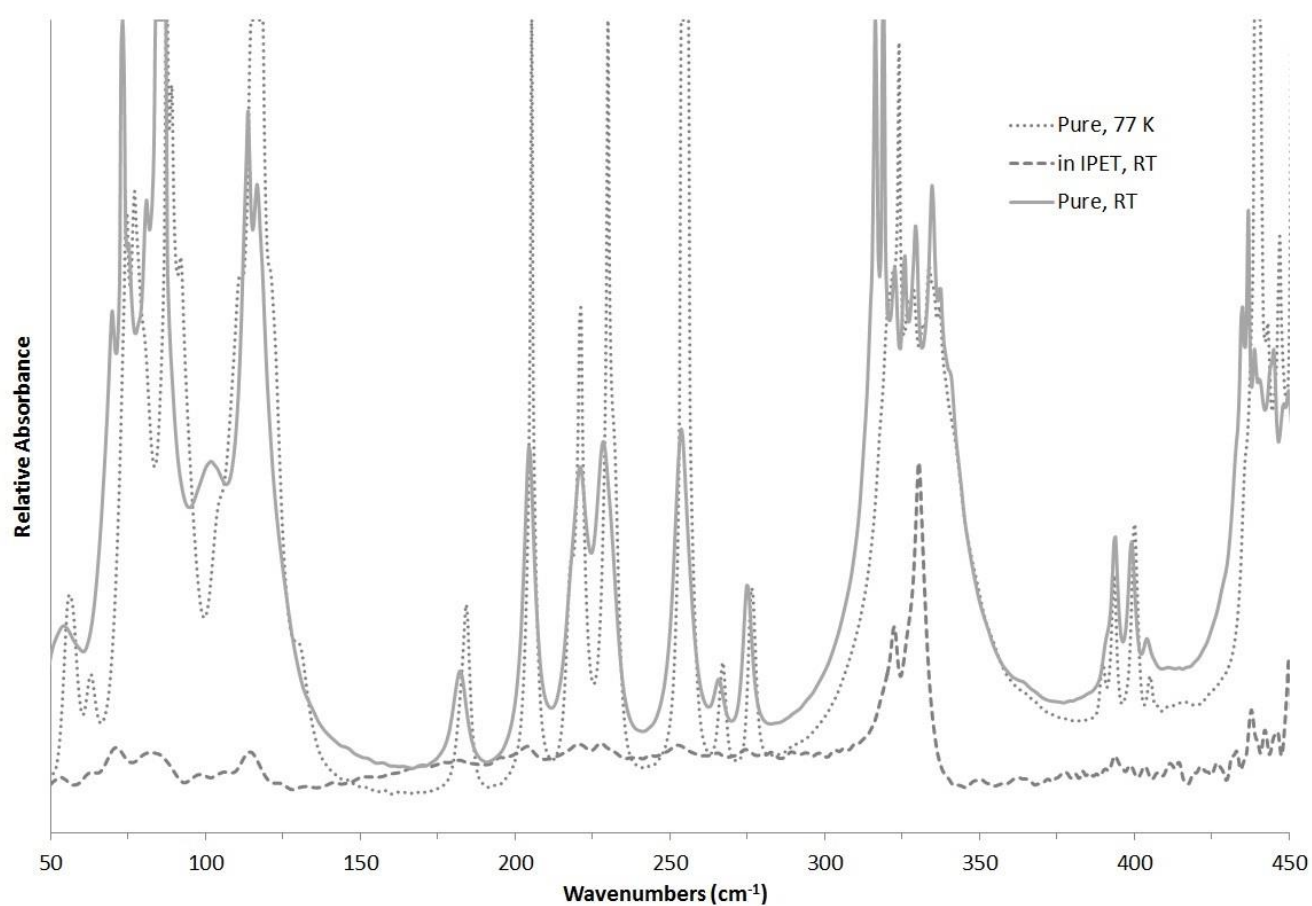

**Figure S1:** Absorption spectra of  $\text{AuPPh}_3\text{Cl}$  pure disks at room temperature and 77 K, as well as diluted in polyethylene at room temperature.
