# Supplementary figures and images for: Far-infrared absorption spectra of synthetically-prepared, ligated metal clusters with Au6, Au8, Au9 and Au6Pd metal cores
Source: Royal Society of Chemistry journal article supplement (doi:10.1039/c3ra44803g), 2013-01-01

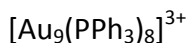

| Center | Atomic Number | Coordinates (Angstroms) |           |           |    |   |           |           |           |
|--------|---------------|-------------------------|-----------|-----------|----|---|-----------|-----------|-----------|
|        |               | X                       | Y         | Z         |    |   |           |           |           |
|        |               |                         |           |           | 47 | 6 | 1.363024  | -5.887268 | 1.075747  |
|        |               |                         |           |           | 48 | 1 | -0.959879 | 4.927338  | 1.407192  |
|        |               |                         |           |           | 49 | 1 | 0.959879  | -4.927338 | 1.407192  |
|        |               |                         |           |           | 50 | 6 | -0.866    | 7.08031   | 1.615741  |
|        |               |                         |           |           | 51 | 6 | 0.866     | -7.08031  | 1.615741  |
|        |               |                         |           |           | 52 | 1 | -0.093848 | 7.048944  | 2.379205  |
|        |               |                         |           |           | 53 | 1 | 0.093848  | -7.048944 | 2.379205  |
|        |               |                         |           |           | 54 | 6 | 1.364031  | -8.313064 | 1.167937  |
|        |               |                         |           |           | 55 | 1 | 0.974426  | -9.237786 | 1.58222   |
|        |               |                         |           |           | 56 | 6 | 2.361262  | -8.353363 | 0.18112   |
|        |               |                         |           |           | 57 | 1 | 2.746557  | -9.307215 | -0.164662 |
|        |               |                         |           |           | 58 | 6 | -2.864717 | -7.161671 | 0.358701  |
|        |               |                         |           |           | 59 | 1 | -3.632631 | -7.198947 | 1.129145  |
|        |               |                         |           |           | 60 | 6 | -5.130733 | -0.216614 | 3.851107  |
|        |               |                         |           |           | 61 | 6 | -5.502826 | -1.513785 | 3.452422  |
|        |               |                         |           |           | 62 | 1 | 4.748383  | 2.232682  | 3.122628  |
|        |               |                         |           |           | 63 | 1 | -4.748383 | -2.232682 | 3.122628  |
|        |               |                         |           |           | 64 | 6 | -6.849155 | -1.892868 | 3.494975  |
|        |               |                         |           |           | 65 | 1 | -7.136175 | -2.893252 | 3.183753  |
|        |               |                         |           |           | 66 | 6 | -7.823728 | -0.984824 | 3.940304  |
|        |               |                         |           |           | 67 | 1 | -8.866906 | -1.282046 | 3.976689  |
|        |               |                         |           |           | 68 | 6 | -7.4474   | 0.302339  | 4.346982  |
|        |               |                         |           |           | 69 | 1 | -8.197265 | 1.000359  | 4.706873  |
|        |               |                         |           |           | 70 | 6 | -6.100525 | 0.692873  | 4.297771  |
|        |               |                         |           |           | 71 | 1 | -5.816577 | 1.698672  | 4.602128  |
|        |               |                         |           |           | 72 | 6 | 2.3985    | 0.906294  | 4.775545  |
|        |               |                         |           |           | 73 | 6 | -2.3985   | -0.906294 | 4.775545  |
|        |               |                         |           |           | 74 | 6 | 2.89968   | 1.302285  | 6.028215  |
|        |               |                         |           |           | 75 | 6 | -2.89968  | -1.302285 | 6.028215  |
|        |               |                         |           |           | 76 | 1 | 3.897519  | 0.999179  | 6.341509  |
|        |               |                         |           |           | 77 | 1 | -3.897519 | -0.999179 | 6.341509  |
|        |               |                         |           |           | 78 | 6 | 2.121335  | 2.115807  | 6.861951  |
|        |               |                         |           |           | 79 | 6 | -2.121335 | -2.115807 | 6.861951  |
|        |               |                         |           |           | 80 | 1 | 2.503255  | 2.41268   | 7.833689  |
|        |               |                         |           |           | 81 | 1 | -2.503255 | -2.41268  | 7.833689  |
|        |               |                         |           |           | 82 | 6 | 0.852515  | 2.546514  | 6.441427  |
|        |               |                         |           |           | 83 | 6 | -0.852515 | -2.546514 | 6.441427  |
|        |               |                         |           |           | 84 | 1 | 0.245885  | 3.170729  | 7.091229  |
|        |               |                         |           |           | 85 | 1 | -0.245885 | -3.170729 | 7.091229  |
|        |               |                         |           |           | 86 | 6 | 0.368314  | 2.179503  | 5.1775    |
|        |               |                         |           |           | 87 | 6 | -0.368314 | -2.179503 | 5.1775    |
|        |               |                         |           |           | 88 | 1 | -0.60549  | 2.526413  | 4.838371  |
|        |               |                         |           |           | 89 | 1 | 0.60549   | -2.526413 | 4.838371  |
|        |               |                         |           |           | 90 | 6 | 1.139855  | 1.357259  | 4.34596   |
|        |               |                         |           |           | 91 | 6 | -1.139855 | -1.357259 | 4.34596   |
|        |               |                         |           |           | 92 | 1 | 0.762189  | 1.073874  | 3.360484  |
|        |               |                         |           |           | 93 | 1 | -0.762189 | -1.073874 | 3.360484  |
|        |               |                         |           |           | 94 | 6 | 3.195193  | -1.960256 | 4.439807  |
|        |               |                         |           |           | 95 | 6 | -3.195193 | 1.960256  | 4.439807  |
|        |               |                         |           |           | 96 | 6 | -3.250021 | 2.155553  | 5.831057  |
|        |               |                         |           |           | 97 | 1 | -3.357035 | 1.308747  | 6.504876  |
| 1      | 79            | 1.415645                | 2.425059  | 0.314187  |    |   |           |           |           |
| 2      | 79            | -1.415645               | -2.425059 | 0.314187  |    |   |           |           |           |
| 3      | 79            | 2.435941                | -0.204913 | 1.411833  |    |   |           |           |           |
| 4      | 79            | -2.435941               | 0.204913  | 1.411833  |    |   |           |           |           |
| 5      | 15            | 3.003552                | 4.31292   | 0.572756  |    |   |           |           |           |
| 6      | 15            | -3.003552               | -4.31292  | 0.572756  |    |   |           |           |           |
| 7      | 15            | 3.344791                | -0.265864 | 3.685543  |    |   |           |           |           |
| 8      | 15            | -3.344791               | 0.265864  | 3.685543  |    |   |           |           |           |
| 9      | 6             | 3.615223                | 4.665544  | 2.291154  |    |   |           |           |           |
| 10     | 6             | -3.615223               | -4.665544 | 2.291154  |    |   |           |           |           |
| 11     | 6             | 2.705043                | 4.557036  | 3.357856  |    |   |           |           |           |
| 12     | 6             | -2.705043               | -4.557036 | 3.357856  |    |   |           |           |           |
| 13     | 1             | 1.679937                | 4.228758  | 3.178411  |    |   |           |           |           |
| 14     | 1             | -1.679937               | -4.228758 | 3.178411  |    |   |           |           |           |
| 15     | 6             | 3.121177                | 4.860867  | 4.660564  |    |   |           |           |           |
| 16     | 6             | -3.121177               | -4.860867 | 4.660564  |    |   |           |           |           |
| 17     | 1             | 2.416443                | 4.780428  | 5.482433  |    |   |           |           |           |
| 18     | 1             | -2.416443               | -4.780428 | 5.482433  |    |   |           |           |           |
| 19     | 6             | 4.444108                | 5.262092  | 4.901226  |    |   |           |           |           |
| 20     | 6             | -4.444108               | -5.262092 | 4.901226  |    |   |           |           |           |
| 21     | 1             | 4.765019                | 5.496398  | 5.911112  |    |   |           |           |           |
| 22     | 1             | -4.765019               | -5.496398 | 5.911112  |    |   |           |           |           |
| 23     | 6             | 5.352606                | 5.364071  | 3.837215  |    |   |           |           |           |
| 24     | 6             | -5.352606               | -5.364071 | 3.837215  |    |   |           |           |           |
| 25     | 1             | -6.373625               | -5.682641 | 4.023173  |    |   |           |           |           |
| 26     | 6             | 4.940721                | 5.067705  | 2.530156  |    |   |           |           |           |
| 27     | 6             | -4.940721               | -5.067705 | 2.530156  |    |   |           |           |           |
| 28     | 1             | -5.646558               | -5.150542 | 1.705278  |    |   |           |           |           |
| 29     | 6             | -4.529336               | 3.913538  | 0.418407  |    |   |           |           |           |
| 30     | 6             | 4.529336                | -3.913538 | 0.418407  |    |   |           |           |           |
| 31     | 6             | -5.054717               | -2.610065 | -0.313694 |    |   |           |           |           |
| 32     | 1             | 4.5858                  | 1.879351  | 0.350353  |    |   |           |           |           |
| 33     | 1             | -4.5858                 | -1.879351 | 0.350353  |    |   |           |           |           |
| 34     | 6             | -6.181688               | 2.247625  | 1.060614  |    |   |           |           |           |
| 35     | 1             | -6.583775               | 1.239809  | 0.986058  |    |   |           |           |           |
| 36     | 6             | -6.796127               | 3.190374  | 1.901627  |    |   |           |           |           |
| 37     | 1             | -7.678558               | 2.912879  | 2.470039  |    |   |           |           |           |
| 38     | 6             | -6.277578               | 4.488341  | 2.001285  |    |   |           |           |           |
| 39     | 1             | -6.75445                | 5.217036  | 2.648955  |    |   |           |           |           |
| 40     | 6             | -5.140555               | 4.852098  | 1.262448  |    |   |           |           |           |
| 41     | 6             | 5.140555                | -4.852098 | 1.262448  |    |   |           |           |           |
| 42     | 1             | -4.735868               | 5.858996  | 1.349053  |    |   |           |           |           |
| 43     | 1             | 4.735868                | -5.858996 | 1.349053  |    |   |           |           |           |
| 44     | 6             | -2.366341               | 5.927225  | 0.091092  |    |   |           |           |           |
| 45     | 6             | 2.366341                | -5.927225 | 0.091092  |    |   |           |           |           |
| 46     | 6             | -1.363024               | 5.887268  | 1.075747  |    |   |           |           |           |

|     |    |           |           |           |     |   |           |           |           |
|-----|----|-----------|-----------|-----------|-----|---|-----------|-----------|-----------|
| 98  | 6  | -3.154962 | 3.450733  | 6.357872  | 149 | 1 | -7.678558 | -2.912879 | -2.470039 |
| 99  | 1  | -3.203195 | 3.59984   | 7.431855  | 150 | 6 | -6.277578 | -4.488341 | -2.001285 |
| 100 | 6  | 3.010712  | -4.55255  | 5.498676  | 151 | 1 | -6.75445  | -5.217036 | -2.648955 |
| 101 | 6  | -3.010712 | 4.55255   | 5.498676  | 152 | 6 | 5.140555  | 4.852098  | -1.262448 |
| 102 | 1  | 2.944625  | -5.554831 | 5.909995  | 153 | 6 | -5.140555 | -4.852098 | -1.262448 |
| 103 | 1  | -2.944625 | 5.554831  | 5.909995  | 154 | 1 | 4.735868  | 5.858996  | -1.349053 |
| 104 | 6  | 2.958168  | -4.357948 | 4.111373  | 155 | 1 | -4.735868 | -5.858996 | -1.349053 |
| 105 | 6  | -2.958168 | 4.357948  | 4.111373  | 156 | 6 | 2.366341  | 5.927225  | -0.091092 |
| 106 | 1  | 2.854491  | -5.20875  | 3.442633  | 157 | 6 | -2.366341 | -5.927225 | -0.091092 |
| 107 | 1  | -2.854491 | 5.20875   | 3.442633  | 158 | 6 | 1.363024  | 5.887268  | -1.075747 |
| 108 | 6  | 3.047576  | -3.062692 | 3.581199  | 159 | 6 | -1.363024 | -5.887268 | -1.075747 |
| 109 | 6  | -3.047576 | 3.062692  | 3.581199  | 160 | 1 | 0.959879  | 4.927338  | -1.407192 |
| 110 | 1  | 3.002975  | -2.910333 | 2.5011    | 161 | 1 | -0.959879 | -4.927338 | -1.407192 |
| 111 | 1  | -3.002975 | 2.910333  | 2.5011    | 162 | 6 | 0.866     | 7.08031   | -1.615741 |
| 112 | 79 | -1.415645 | 2.425059  | -0.314187 | 163 | 6 | -0.866    | -7.08031  | -1.615741 |
| 113 | 79 | 1.415645  | -2.425059 | -0.314187 | 164 | 1 | 0.093848  | 7.048944  | -2.379205 |
| 114 | 79 | -2.435941 | -0.204913 | -1.411833 | 165 | 1 | -0.093848 | -7.048944 | -2.379205 |
| 115 | 79 | 2.435941  | 0.204913  | -1.411833 | 166 | 6 | -1.364031 | -8.313064 | -1.167937 |
| 116 | 79 | 0         | 0         | 0         | 167 | 1 | -0.974426 | -9.237786 | -1.58222  |
| 117 | 15 | -3.003552 | 4.31292   | -0.572756 | 168 | 6 | -2.361262 | -8.353363 | -0.18112  |
| 118 | 15 | 3.003552  | -4.31292  | -0.572756 | 169 | 1 | -2.746557 | -9.307215 | 0.164662  |
| 119 | 15 | -3.344791 | -0.265864 | -3.685543 | 170 | 6 | 2.864717  | -7.161671 | -0.358701 |
| 120 | 15 | 3.344791  | 0.265864  | -3.685543 | 171 | 1 | 3.632631  | -7.198947 | -1.129145 |
| 121 | 6  | -3.615223 | 4.665544  | -2.291154 | 172 | 6 | -5.130733 | 0.216614  | -3.851107 |
| 122 | 6  | 3.615223  | -4.665544 | -2.291154 | 173 | 6 | -5.502826 | 1.513785  | -3.452422 |
| 123 | 6  | -2.705043 | 4.557036  | -3.357856 | 174 | 1 | -4.748383 | 2.232682  | -3.122628 |
| 124 | 6  | 2.705043  | -4.557036 | -3.357856 | 175 | 1 | 4.748383  | -2.232682 | -3.122628 |
| 125 | 1  | -1.679937 | 4.228758  | -3.178411 | 176 | 6 | -6.849155 | 1.892868  | -3.494975 |
| 126 | 1  | 1.679937  | -4.228758 | -3.178411 | 177 | 1 | -7.136175 | 2.893252  | -3.183753 |
| 127 | 6  | -3.121177 | 4.860867  | -4.660564 | 178 | 6 | -7.823728 | 0.984824  | -3.940304 |
| 128 | 6  | 3.121177  | -4.860867 | -4.660564 | 179 | 1 | -8.866906 | 1.282046  | -3.976689 |
| 129 | 1  | -2.416443 | 4.780428  | -5.482433 | 180 | 6 | -7.4474   | -0.302339 | -4.346982 |
| 130 | 1  | 2.416443  | -4.780428 | -5.482433 | 181 | 1 | -8.197265 | -1.000359 | -4.706873 |
| 131 | 6  | -4.444108 | 5.262092  | -4.901226 | 182 | 6 | -6.100525 | -0.692873 | -4.297771 |
| 132 | 6  | 4.444108  | -5.262092 | -4.901226 | 183 | 1 | -5.816577 | -1.698672 | -4.602128 |
| 133 | 1  | -4.765019 | 5.496398  | -5.911112 | 184 | 6 | -2.3985   | 0.906294  | -4.775545 |
| 134 | 1  | 4.765019  | -5.496398 | -5.911112 | 185 | 6 | 2.3985    | -0.906294 | -4.775545 |
| 135 | 6  | -5.352606 | 5.364071  | -3.837215 | 186 | 6 | -2.89968  | 1.302285  | -6.028215 |
| 136 | 6  | 5.352606  | -5.364071 | -3.837215 | 187 | 6 | 2.89968   | -1.302285 | -6.028215 |
| 137 | 1  | -6.373625 | 5.682641  | -4.023173 | 188 | 1 | -3.897519 | 0.999179  | -6.341509 |
| 138 | 6  | -4.940721 | 5.067705  | -2.530156 | 189 | 1 | 3.897519  | -0.999179 | -6.341509 |
| 139 | 6  | 4.940721  | -5.067705 | -2.530156 | 190 | 6 | -2.121335 | 2.115807  | -6.861951 |
| 140 | 1  | -5.646558 | 5.150542  | -1.705278 | 191 | 6 | 2.121335  | -2.115807 | -6.861951 |
| 141 | 6  | 4.529336  | 3.913538  | -0.418407 | 192 | 1 | -2.503255 | 2.41268   | -7.833689 |
| 142 | 6  | -4.529336 | -3.913538 | -0.418407 | 193 | 1 | 2.503255  | -2.41268  | -7.833689 |
| 143 | 6  | -5.054717 | 2.610065  | 0.313694  | 194 | 6 | -0.852515 | 2.546514  | -6.441427 |
| 144 | 1  | -4.5858   | 1.879351  | -0.350353 | 195 | 6 | 0.852515  | -2.546514 | -6.441427 |
| 145 | 1  | 4.5858    | -1.879351 | -0.350353 | 196 | 1 | -0.245885 | 3.170729  | -7.091229 |
| 146 | 6  | -6.181688 | -2.247625 | -1.060614 | 197 | 1 | 0.245885  | -3.170729 | -7.091229 |
| 147 | 1  | -6.583775 | -1.239809 | -0.986058 | 198 | 6 | -0.368314 | 2.179503  | -5.1775   |
| 148 | 6  | -6.796127 | -3.190374 | -1.901627 | 199 | 6 | 0.368314  | -2.179503 | -5.1775   |

|     |   |           |           |           |     |   |          |           |           |
|-----|---|-----------|-----------|-----------|-----|---|----------|-----------|-----------|
| 200 | 1 | 0.60549   | 2.526413  | -4.838371 | 251 | 6 | 7.4474   | -0.302339 | 4.346982  |
| 201 | 1 | -0.60549  | -2.526413 | -4.838371 | 252 | 1 | 8.197265 | -1.000359 | 4.706873  |
| 202 | 6 | -1.139855 | 1.357259  | -4.34596  | 253 | 6 | 6.100525 | -0.692873 | 4.297771  |
| 203 | 6 | 1.139855  | -1.357259 | -4.34596  | 254 | 1 | 5.816577 | -1.698672 | 4.602128  |
| 204 | 1 | -0.762189 | 1.073874  | -3.360484 | 255 | 6 | 3.250021 | -2.155553 | 5.831057  |
| 205 | 1 | 0.762189  | -1.073874 | -3.360484 | 256 | 1 | 3.357035 | -1.308747 | 6.504876  |
| 206 | 6 | -3.195193 | -1.960256 | -4.439807 | 257 | 6 | 3.154962 | -3.450733 | 6.357872  |
| 207 | 6 | 3.195193  | 1.960256  | -4.439807 | 258 | 1 | 3.203195 | -3.59984  | 7.431855  |
| 208 | 6 | -3.250021 | -2.155553 | -5.831057 | 259 | 1 | 6.373625 | -5.682641 | -4.023173 |
| 209 | 1 | -3.357035 | -1.308747 | -6.504876 | 260 | 1 | 5.646558 | -5.150542 | -1.705278 |
| 210 | 6 | -3.154962 | -3.450733 | -6.357872 | 261 | 6 | 5.054717 | -2.610065 | 0.313694  |
| 211 | 1 | -3.203195 | -3.59984  | -7.431855 | 262 | 6 | 6.181688 | 2.247625  | -1.060614 |
| 212 | 6 | -3.010712 | -4.55255  | -5.498676 | 263 | 1 | 6.583775 | 1.239809  | -0.986058 |
| 213 | 6 | 3.010712  | 4.55255   | -5.498676 | 264 | 6 | 6.796127 | 3.190374  | -1.901627 |
| 214 | 1 | -2.944625 | -5.554831 | -5.909995 | 265 | 1 | 7.678558 | 2.912879  | -2.470039 |
| 215 | 1 | 2.944625  | 5.554831  | -5.909995 | 266 | 6 | 6.277578 | 4.488341  | -2.001285 |
| 216 | 6 | -2.958168 | -4.357948 | -4.111373 | 267 | 1 | 6.75445  | 5.217036  | -2.648955 |
| 217 | 6 | 2.958168  | 4.357948  | -4.111373 | 268 | 6 | 5.130733 | -0.216614 | -3.851107 |
| 218 | 1 | -2.854491 | -5.20875  | -3.442633 | 269 | 6 | 5.502826 | -1.513785 | -3.452422 |
| 219 | 1 | 2.854491  | 5.20875   | -3.442633 | 270 | 6 | 6.849155 | -1.892868 | -3.494975 |
| 220 | 6 | -3.047576 | -3.062692 | -3.581199 | 271 | 1 | 7.136175 | -2.893252 | -3.183753 |
| 221 | 6 | 3.047576  | 3.062692  | -3.581199 | 272 | 6 | 7.823728 | -0.984824 | -3.940304 |
| 222 | 1 | -3.002975 | -2.910333 | -2.5011   | 273 | 1 | 8.866906 | -1.282046 | -3.976689 |
| 223 | 1 | 3.002975  | 2.910333  | -2.5011   | 274 | 6 | 7.4474   | 0.302339  | -4.346982 |
| 224 | 6 | -1.364031 | 8.313064  | 1.167937  | 275 | 1 | 8.197265 | 1.000359  | -4.706873 |
| 225 | 1 | -0.974426 | 9.237786  | 1.58222   | 276 | 6 | 6.100525 | 0.692873  | -4.297771 |
| 226 | 6 | -2.361262 | 8.353363  | 0.18112   | 277 | 1 | 5.816577 | 1.698672  | -4.602128 |
| 227 | 1 | -2.746557 | 9.307215  | -0.164662 | 278 | 6 | 3.250021 | 2.155553  | -5.831057 |
| 228 | 6 | 2.864717  | 7.161671  | 0.358701  | 279 | 1 | 3.357035 | 1.308747  | -6.504876 |
| 229 | 1 | 3.632631  | 7.198947  | 1.129145  | 280 | 6 | 3.154962 | 3.450733  | -6.357872 |
| 230 | 6 | 1.364031  | 8.313064  | -1.167937 | 281 | 1 | 3.203195 | 3.59984   | -7.431855 |
| 231 | 1 | 0.974426  | 9.237786  | -1.58222  |     |   |          |           |           |
| 232 | 6 | 2.361262  | 8.353363  | -0.18112  |     |   |          |           |           |
| 233 | 1 | 2.746557  | 9.307215  | 0.164662  |     |   |          |           |           |
| 234 | 6 | -2.864717 | 7.161671  | -0.358701 |     |   |          |           |           |
| 235 | 1 | -3.632631 | 7.198947  | -1.129145 |     |   |          |           |           |
| 236 | 1 | 6.373625  | 5.682641  | 4.023173  |     |   |          |           |           |
| 237 | 1 | 5.646558  | 5.150542  | 1.705278  |     |   |          |           |           |
| 238 | 6 | 5.054717  | 2.610065  | -0.313694 |     |   |          |           |           |
| 239 | 6 | 6.181688  | -2.247625 | 1.060614  |     |   |          |           |           |
| 240 | 1 | 6.583775  | -1.239809 | 0.986058  |     |   |          |           |           |
| 241 | 6 | 6.796127  | -3.190374 | 1.901627  |     |   |          |           |           |
| 242 | 1 | 7.678558  | -2.912879 | 2.470039  |     |   |          |           |           |
| 243 | 6 | 6.277578  | -4.488341 | 2.001285  |     |   |          |           |           |
| 244 | 1 | 6.75445   | -5.217036 | 2.648955  |     |   |          |           |           |
| 245 | 6 | 5.130733  | 0.216614  | 3.851107  |     |   |          |           |           |
| 246 | 6 | 5.502826  | 1.513785  | 3.452422  |     |   |          |           |           |
| 247 | 6 | 6.849155  | 1.892868  | 3.494975  |     |   |          |           |           |
| 248 | 1 | 7.136175  | 2.893252  | 3.183753  |     |   |          |           |           |
| 249 | 6 | 7.823728  | 0.984824  | 3.940304  |     |   |          |           |           |
| 250 | 1 | 8.866906  | 1.282046  | 3.976689  |     |   |          |           |           |

Supplement: c3ra44803g_4.pdf [file c3ra44803g_4.pdf]
